# Supplementary material for: A tumor-sensitive biological metal–organic complex for drug delivery and cancer therapy
Source: Royal Society of Chemistry journal article supplement (doi:10.1039/d0tb00599a), 2020-01-01
Supplement: d0tb00599a1.pdf [file d0tb00599a1.pdf]

## Supporting information

### **A tumor-sensitive biological metal-organic complex for drug delivery and cancer therapy**

Zelei Jiang,<sup>a</sup> Tong Wang,<sup>a</sup> Shuai Yuan,<sup>a</sup> Mengfan Wang,<sup>\*,a,b</sup> Wei Qi,<sup>a,b,c</sup>

Rongxin Su,<sup>a,b,c</sup> Zhimin He<sup>a</sup>

<sup>a</sup> School of Chemical Engineering and Technology, State Key Laboratory of Chemical Engineering, Tianjin University, Tianjin 300350, P. R. China.

<sup>b</sup> The Co-Innovation Centre of Chemistry and Chemical Engineering of Tianjin, Tianjin 300072, P. R. China.

<sup>c</sup> Tianjin Key Laboratory of Membrane Science and Desalination Technology, Tianjin 300350, P. R. China.

Corresponding author E-mail: [mwang@tju.edu.cn](mailto:mwang@tju.edu.cn) (M.W.).

**Table S1.** bioMOC-Fe(Cys) synthesized at different temperatures

| Temperature (°C) | SEM/TEM <sup>a</sup>                                                              | Morphology        | Average Size (nm)                    |
|------------------|-----------------------------------------------------------------------------------|-------------------|--------------------------------------|
| 40               | 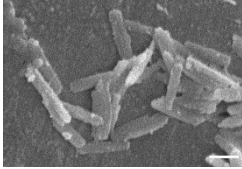 | nanorod           | L=380 ± 7.8<br>W=60~100 <sup>b</sup> |
| 60               |  | amorphous cluster | 1400 ± 15.5 <sup>c</sup>             |
| 80               | N.D.                                                                              | N.D.              | N.D.                                 |
| 120              | N.D.                                                                              | N.D.              | N.D.                                 |
| 150              | N.D.                                                                              | N.D.              | N.D.                                 |

<sup>a</sup> Scale bars = 200 nm. <sup>b</sup> Statistical analysis of TEM/SEM images, L: length, W: width.

<sup>c</sup> Measured using DLS.

**Table S2.** bioMOC-Zr(Cys) synthesized at different temperatures

| Temperature (°C) | SEM/TEM <sup>a</sup>                                                                | Morphology           | Average Size (nm) |
|------------------|-------------------------------------------------------------------------------------|----------------------|-------------------|
| 40               | 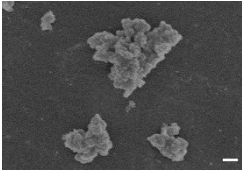   | amorphous<br>cluster | $695 \pm 9.8^b$   |
| 60               |    | amorphous<br>cluster | $689 \pm 8.7^b$   |
| 80               |   | amorphous<br>cluster | $567 \pm 4.5^b$   |
| 120              |  | amorphous<br>cluster | $301 \pm 3.9^b$   |
| 150              | N.D.                                                                                | N.D.                 | N.D.              |

<sup>a</sup> Scale bars = 200 nm. <sup>b</sup> Measured using DLS.

**Table S3.** Comparison of the cumulative amount of drug released from some GSH-sensitive NDDSs

| NDDSs             | Cumulative release (%) |                    | Release time (h) | Reference                         |
|-------------------|------------------------|--------------------|------------------|-----------------------------------|
|                   | No GSH (pH 7.4)        | 10 mM GSH (pH 7.4) |                  |                                   |
| TTMOF             | 16.5                   | 78.5               | 140              | Wang <i>et al.</i> <sup>[1]</sup> |
| ZDOS NPs          | 17.5                   | 38.5               | 48               | Ren <i>et al.</i> <sup>[2]</sup>  |
| Mn-SS/DOX@PDA-PEG | 18.5                   | 45.5               | 24               | Zhao <i>et al.</i> <sup>[3]</sup> |
| MSN-ss-GHA        | 11.77                  | 51.1               | 60               | Chen <i>et al.</i> <sup>[4]</sup> |
| MOF-Zr(DTBA)      | 50                     | 87.4               | 22               | Lei <i>et al.</i> <sup>[5]</sup>  |
| bioMOC-Zn(Cys)    | 8.25                   | 83.3               | 48               | <b>This study</b>                 |

**Table S4.** Comparison of the cytotoxicity of MOF-based drug carriers

| Carriers                            | Cells      | Concentration ( $\mu\text{g/mL}$ ) | Incubation time (h) | Cell viability (%) | Reference                         |
|-------------------------------------|------------|------------------------------------|---------------------|--------------------|-----------------------------------|
| ZJU-101                             | PC12       | 200                                | 24                  | 80.0               | Yang <i>et al.</i> <sup>[6]</sup> |
| PCN-221                             | PC12       | 100                                | 24                  | 90.0               | Lin <i>et al.</i> <sup>[7]</sup>  |
| Fe-MIL-53-NH <sub>2</sub> -FA-5-FAM | HASMC      | 200                                | 24                  | 84.5               | Gao <i>et al.</i> <sup>[8]</sup>  |
|                                     | MGC-803    | 200                                | 24                  | 78.5               |                                   |
| ZIF-8                               | HeLa       | 100                                | 48                  | 83.5               | Ren <i>et al.</i> <sup>2</sup>    |
|                                     | MCF-7      | 100                                | 48                  | 82.5               |                                   |
| MOF-Zr(DTBA)                        | HeLa       | 200                                | 24                  | 70.5               | Lei <i>et al.</i> <sup>5</sup>    |
|                                     | MDA-MB-231 | 200                                | 24                  | 80.5               |                                   |
| bioMOC-Zn(Cys)                      | A549       | 200                                | 24                  | 97.7               | <b>This study</b>                 |
|                                     | BEAS-2B    | 200                                | 24                  | 93.9               |                                   |

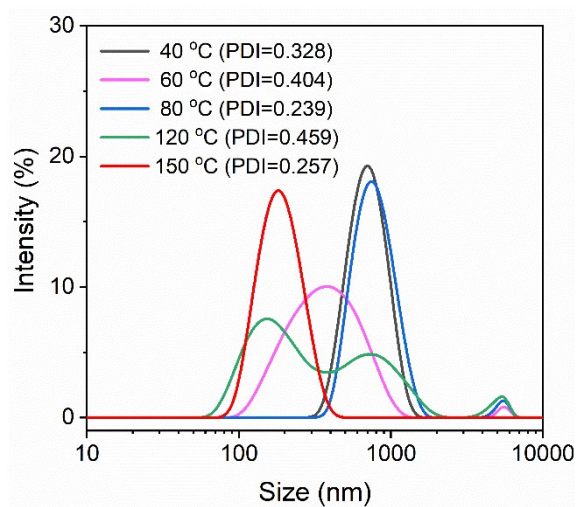

**Figure S1.** The DLS analysis of bioMOC-Zn(Cys) synthesized at different temperatures.

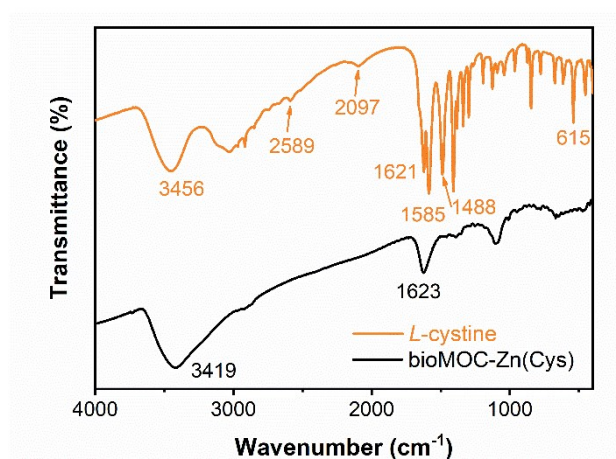

**Figure S2.** FTIR spectra of *L*-cystine and the bioMOC-Zn(Cys) nanocarrier synthesized at 150 °C.

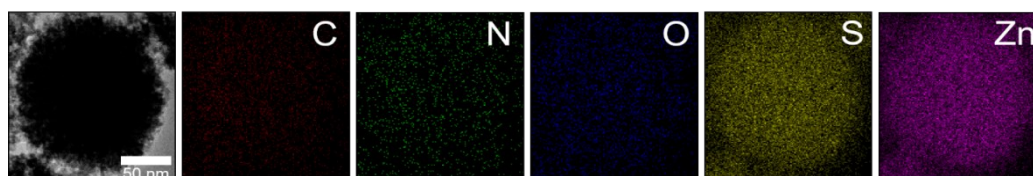

**Figure S3.** Elemental mapping images of a bioMOC-Zn(Cys) nanoparticle.

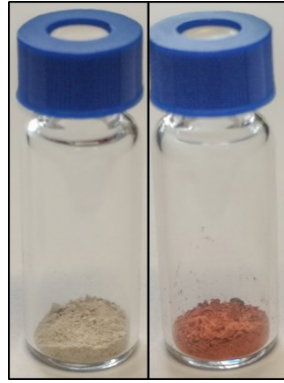

**Figure S4.** Photographs of lyophilized bioMOC-Zn(Cys) and DOX@bioMOC-Zn(Cys) powders.

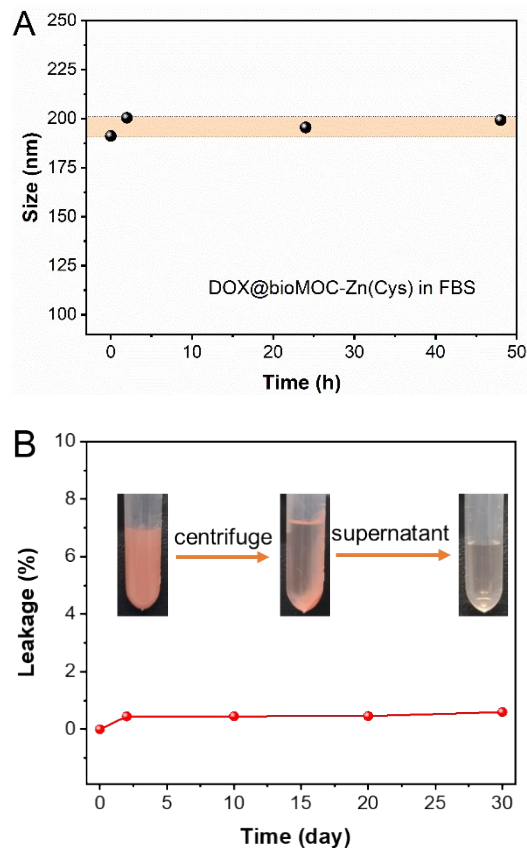

**Figure S5.** Hydrodynamic diameters of DOX@bioMOC-Zn(Cys) incubated in 20% FBS (A). Drug leakage from DOX@bioMOC-Zn(Cys) during 30 days of storage in deionized water at 4 °C (B).

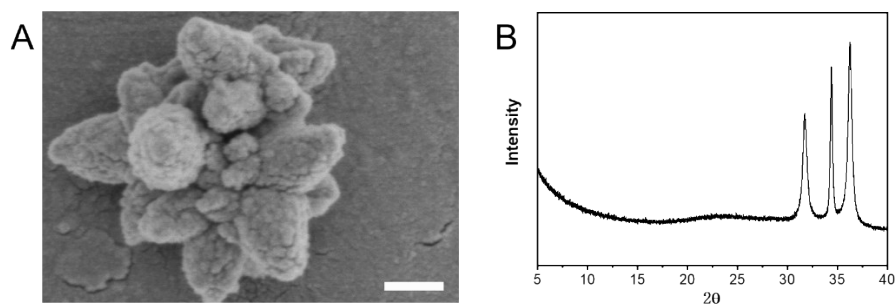

**Figure S6.** (A) SEM image of a bioMOC-Zn(Lys) particle. Scale bar =200 nm. (B) PXRD analysis of bioMOC-Zn(Lys).

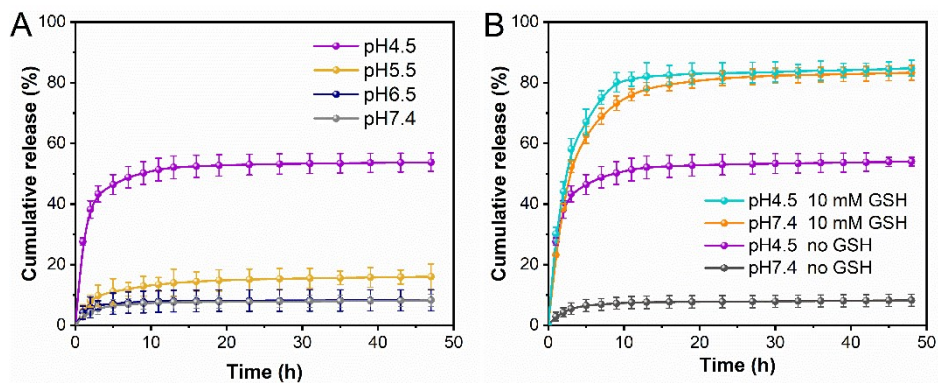

**Figure S7.** Drug release from DOX@bioMOC-Zn(Cys) in PBS at different pH values (A). Drug release from DOX@bioMOC-Zn(Cys) in PBS (pH 7.4 or pH 5.5) with and without GSH (B).

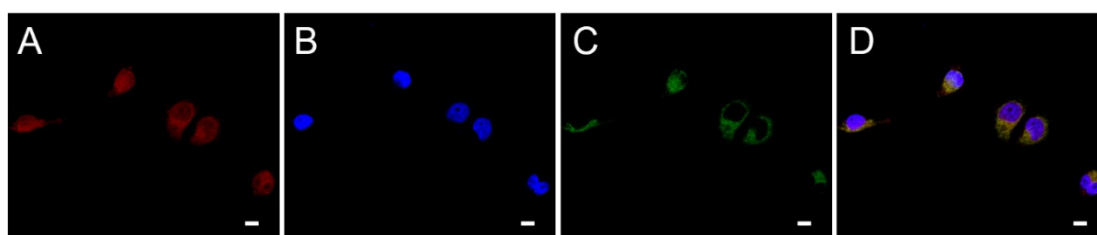

**Figure S8.** CLSM images of A549 cells after a 4 h incubation with DOX@bioMOC-Zn(Cys). (A) Red fluorescence of DOX, (B) cell nuclei stained with DAPI, (C) late endosomes and lysosomes stained with LysoTracker Green and (D) merged image (scale bars: 10  $\mu$ m)

Confocal laser scanning microscopy (CLSM) analyses were used to investigate the endocytosis of DOX@bioMOC-Zn(Cys) in human lung cancer cells (A549 cells). The intrinsic red fluorescence of DOX was used to monitor the intracellular distribution of DOX@bioMOC-Zn(Cys). The blue fluorescence indicated the cell nuclei stained with DAPI. Late endosomes and lysosomes were stained with LysoTracker Green. As shown in **Figure S8**, the red fluorescence overlapped with both the green (endosomes and lysosomes) and blue areas (nuclei) in cells that had been exposed to DOX@bioMOC-Zn(Cys) for 4 h. Thus, DOX@bioMOC-Zn(Cys) was taken up by A549 cells via endocytosis, and the drug that accumulated in endosome/lysosomal compartments was further delivered to the cell nucleus.

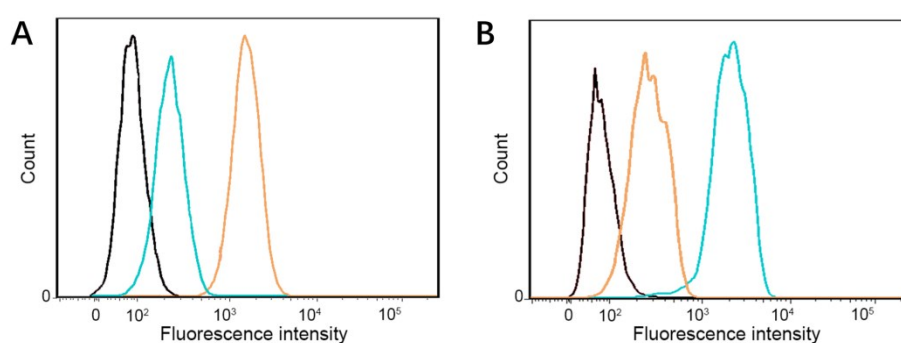

**Figure S9.** Flow cytometry analysis of A549 cells (A) and BEAS-2B cells (B) after a 0.5-h treatment with free DOX (cyan), DOX@bioMOC-Zn(Cys) (orange) or the blank (black).



## REFERENCES

- 1 X. Wang, Z. Dong, H. Cheng, S. Wan, W. Chen, M. Zou, J. Huo, H. Deng and X. Zhang, *Nanoscale*, 2015, **7**, 16061.
- 2 S. Z. Ren, D. Zhu, X. H. Zhu, B. Wang, Y. S. Yang, W. X. Sun, X. M. Wang, P. C. Lv, Z. C. Wang and H. L. Zhu, *ACS Appl. Mater. Interfaces*, 2019, **11**, 20678-20688.
- 3 J. Zhao, Y. Yang, X. Han, C. Liang, J. Liu, X. Song, Z. Ge and Z. Liu, *ACS Appl. Mater. Interfaces*, 2017, **9**, 23555.
- 4 L. Chen, X. Zhou, W. Nie, Q. Zhang, W. Wang, Y. Zhang and C. He, *ACS Appl. Mater. Interfaces*, 2016, **8**, 33829.
- 5 B. Lei, M. Wang, Z. Jiang, W. Qi, R. Su and Z. He, *ACS Appl. Mater. Interfaces*, 2018, **10**, 16698.
- 6 Y. Yang, Q. Hu, Q. Zhang, K. Jiang, W. Lin, Y. Yang, Y. Cui and G. Qian, *Mol. Pharm.*, 2016, **13**, 2782-2786.
- 7 W. Lin, Q. Hu, K. Jiang, Y. Yang, Y. Yang, Y. Cui and G. Qian, *J Solid State Chem*, 2016, **237**, 307.
- 8 X. Gao, M. Zhai, W. Guan, J. Liu, Z. Liu and A. Damirin, *Acs Appl Mater Interfaces*, 2017, **9**, 3455.
